# Supplementary material for: A Liquid–Solid Interface-Based Triboelectric Tactile Sensor with Ultrahigh Sensitivity of 21.48 kPa−1
Source: PubMed Central journal article supplement (PMC8975924; doi:10.1007/s40820-022-00831-7), 2022-04-01
Supplement: 40820_2022_831_MOESM1_ESM.pdf [file 40820_2022_831_MOESM1_ESM.pdf]

Supporting Information for

## A Liquid-Solid Interface based Triboelectric Tactile Sensor with Ultrahigh Sensitivity of $21.48 \text{ kPa}^{-1}$

Jingya Liu<sup>1</sup>, Zhen Wen<sup>1,\*</sup>, Hao Lei<sup>1</sup>, Zhenqiu Gao<sup>1</sup>, and Xuhui Sun<sup>1,\*</sup>

<sup>1</sup>Institute of Functional Nano and Soft Materials (FUNSOM), Jiangsu Key Laboratory for Carbon-Based Functional Materials and Devices, Soochow University, Suzhou 215123, P. R. China

\*Corresponding authors. E-mail: [wenzhen2011@suda.edu.cn](mailto:wenzhen2011@suda.edu.cn) (Z. Wen); [xhsun@suda.edu.cn](mailto:xhsun@suda.edu.cn) (X. Sun)

### Supplementary Figures

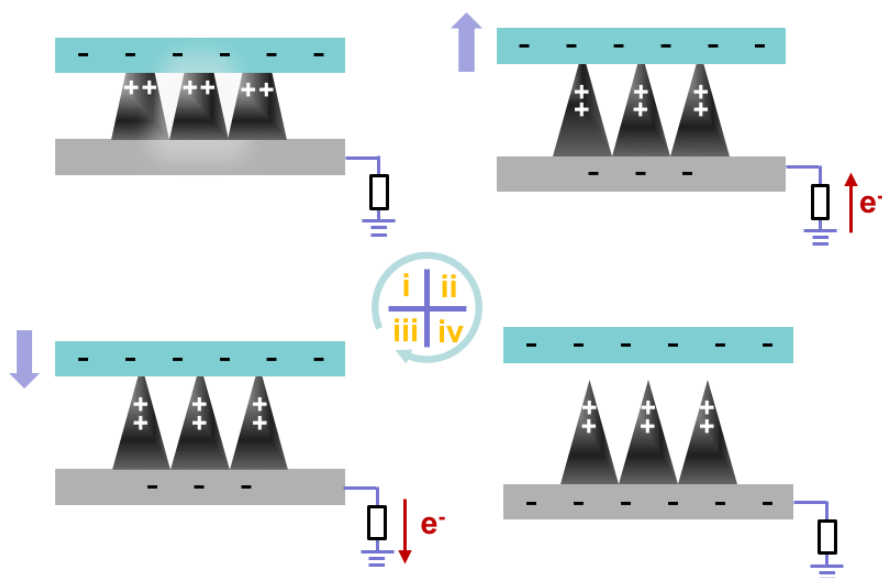

**Fig. S1** Complete working principle of the FTTS

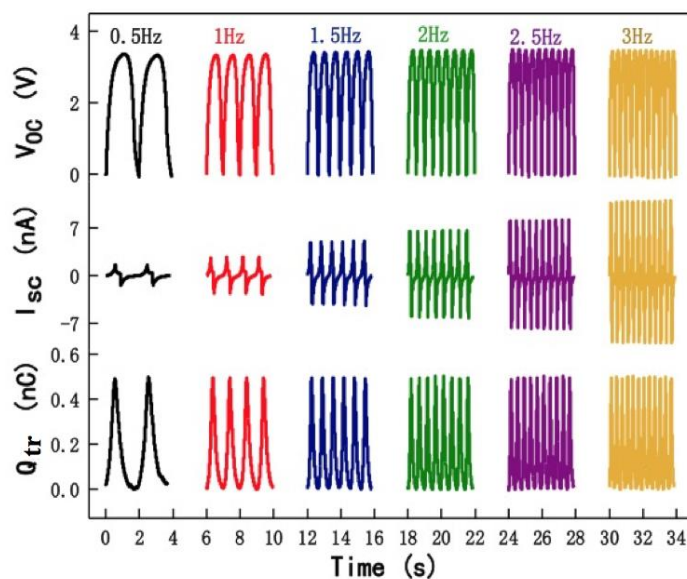

**Fig. S2** Electrical output of the FTTS including open-circuit voltage ( $V_{oc}$ ), short-circuit current ( $I_{sc}$ ) and transfer charge ( $Q_{tr}$ )

Nano-Micro Letters

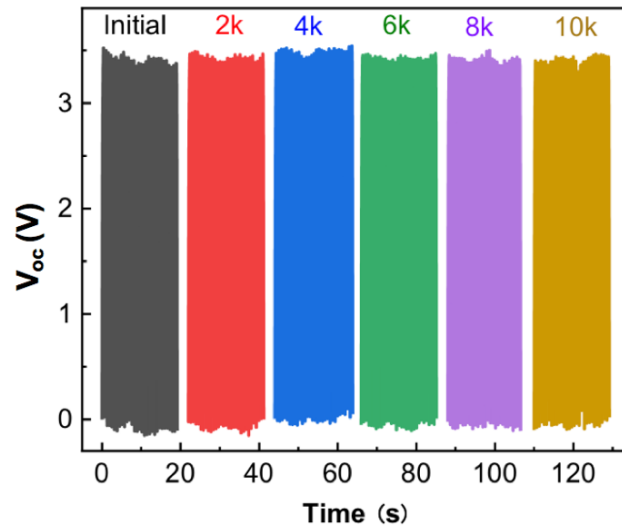

**Fig. S3** Stability testing of the FTTS with 10000 cycles

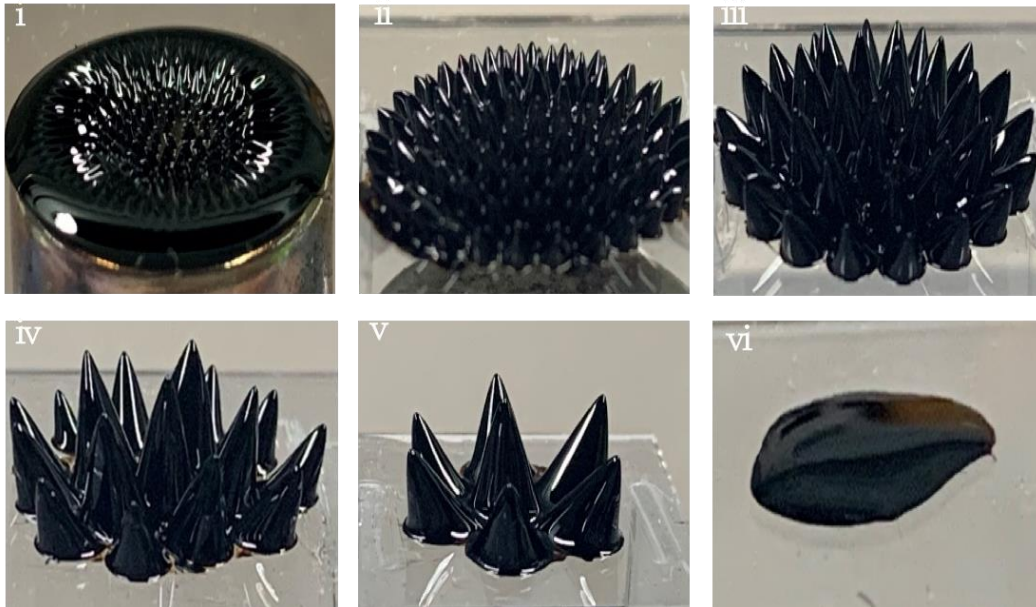

**Fig. S4** Photograph of the topography of ferrofluid patterns at all six distances with magnet, from 0 to 2 cm at intervals of 4 mm

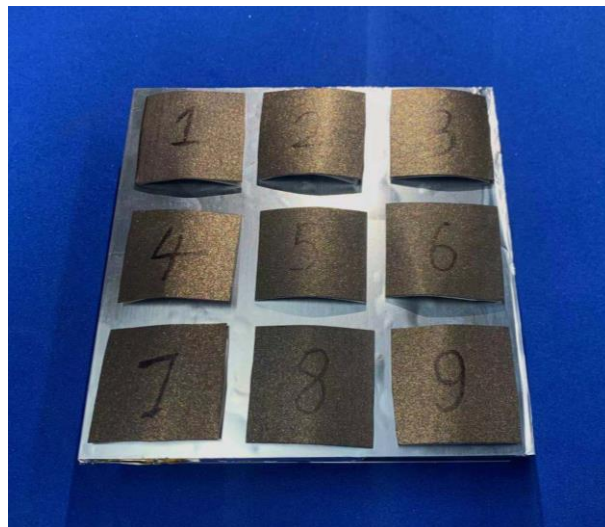

**Fig. S5** Photograph of FTTS array as a nine-digit password lock

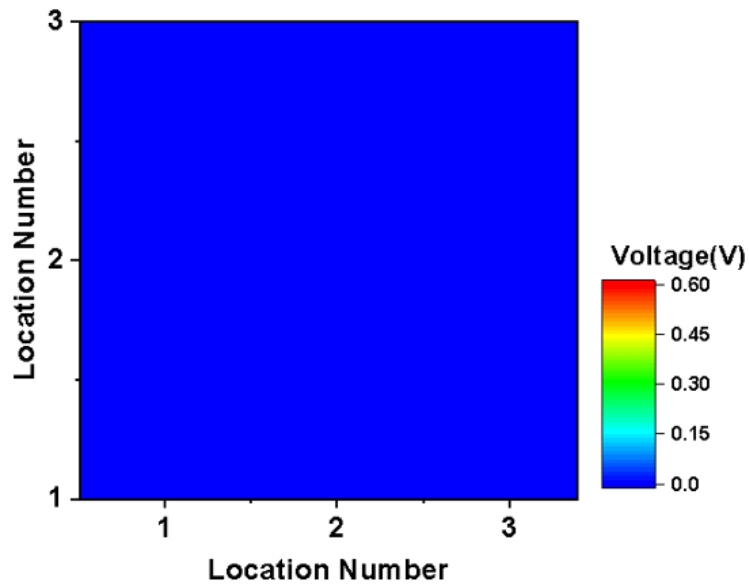

**Fig. S6** Contour map of voltage output of all FTTS units in the matrix is at the background level before any pressing

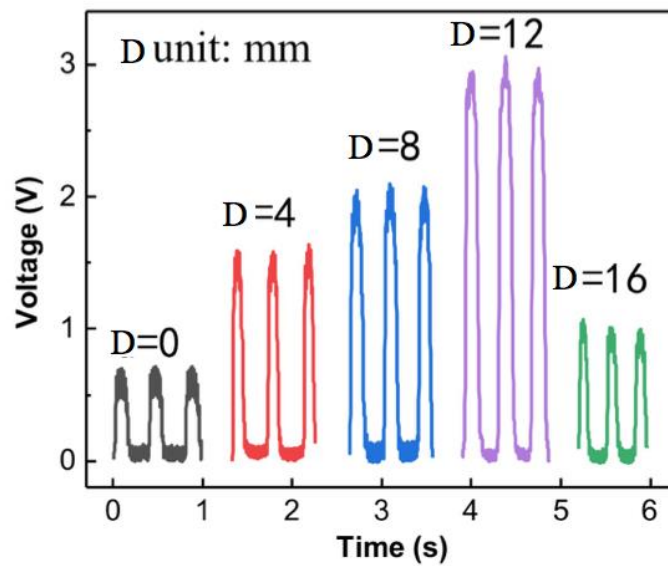

**Fig. S7** Different voltage output when changing distance with magnet under the same external pressing ( $F = 20$  N)
